# Supplementary material
Source: PubMed Central journal article supplement (PMC5587862)
Supplement: supp_RA117.000049_4593_1_supp_3035_qsk2p3.pdf [file supp_RA117.000049_4593_1_supp_3035_qsk2p3.pdf]

## Supplementary Figures

### Supplementary figure 1

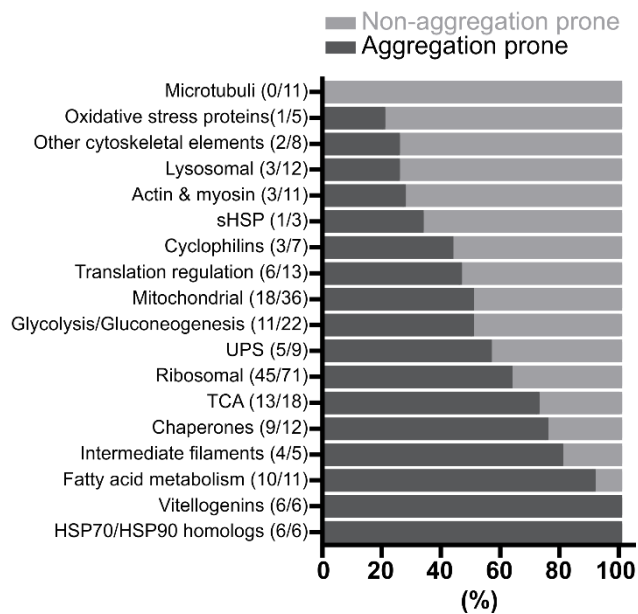

**Figure S1** Aggregation propensity differs widely between functional protein subsets. Ratios of aggregation prone proteins within specific functional protein subsets are given between brackets (33).

### Supplementary figure 2

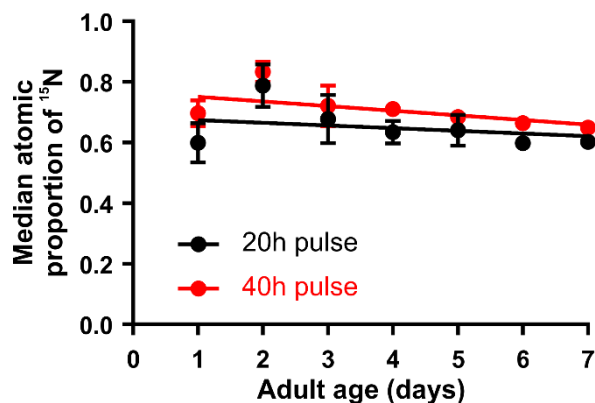

**Figure S2** Median atomic proportion of <sup>15</sup>N in newly synthesized heavy peptides does not change drastically over adult age. Overview of the data is included in Table S6 (Supporting information).
